# Supplementary material
Source: Springer Nature journal article supplement (https://www.springermedizin.de/resource/supplementary/13256_2009_1227_MOESM3_ESM.pdf/9647288)

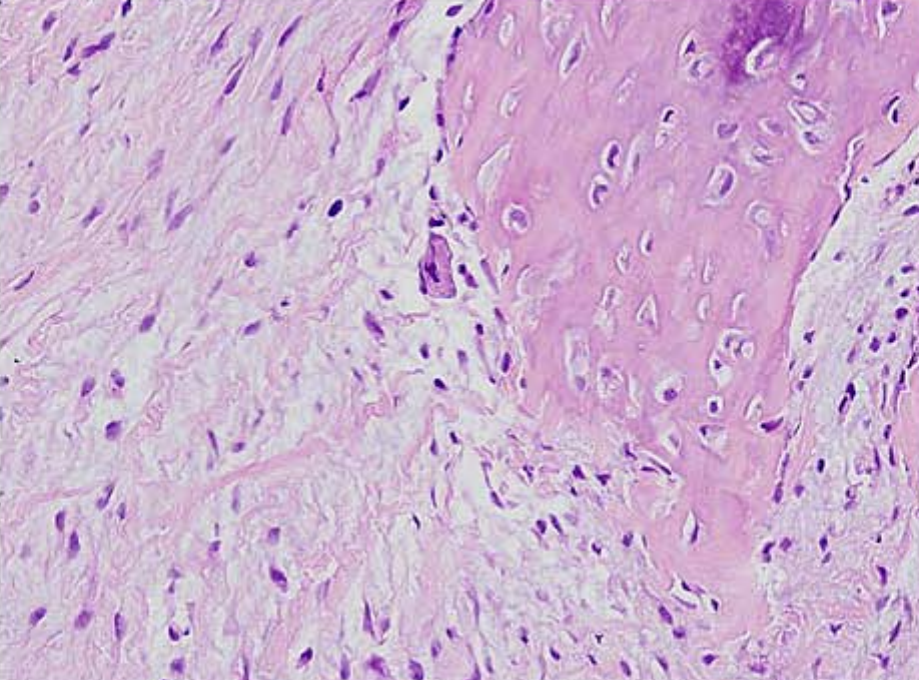

Supplement: MOESM3 [file 9647288]
